# Supplementary material for: A protocol for estimating health burden posed by early life exposure to ambient fine particulate matter and its heavy metal composition: a mother–child birth (ELitE) cohort from Central India
Source: Frontiers journal article supplement (doi:10.3389/fpubh.2025.1485417), 2025-05-20
Supplement: Table_1.docx [file Table_1.docx]

Supplementary Material

# Table S1: Exclusion criteria: Details of operational definitions to be used for excluding participants at the time of enrolment and during follow-up phases

| **Criteria** | **Operational definition** | **Reason for exclusion** |
| --- | --- | --- |
| **Exclusion at the time of enrolment:** | | |
| High-risk pregnancy (HRH) | - **Maternal risks:** < 18 years of age at conception, Height < 140 cm (cm), body mass index (BMI) ≥30.0 kilograms per square metre (1) - **Risk posed by current/past bad obstetric history:** twin/multiple pregnancies, history of recurrent pregnancy loss (≥ 3 consecutive pregnancy losses before 20-22 weeks of gestation) associated with diagnosed chromosomal abnormalities; endocrine disorders such as hypothyroidism, uterine anatomic abnormalities, heritable and/or acquired thrombophilia, immunological abnormalities, antiphospholipid antibody syndrome (APS)(1–3). | Higher probability of maternal and foetal morbidity and mortality(1) which will lead to participant exclusion/ attrition during the follow-up of the cohort study. |
| Use of assisted reproductive technology (ART) | - Technologies such as in vitro fertilisation (IVF) and intracytoplasmic sperm injection (ICSI)(4) | ART increases the potential for obstetric complications and subsequent mortality. (4) It also raises the risk of adverse birth outcomes, including preterm birth, small for gestational age (SGA), low birth weight (LBW), stillbirths and miscarriage as well as birth defects. (4) Hence, excluding pregnant women with a history of ART use will reduce participant exclusion/ attrition during the follow-up of the cohort study. |
| Women predominantly use unclean fuel for indoor cooking | - Cooking inside the house with or without a separate kitchen using unclean forms of fuel such as fire-wood, crop residue, cow dung cake, coal, lignite, charcoal, and kerosene as per the Census of India questionnaire for housing data(5) | This is a lifestyle factor predisposing to high PM exposure and has been independently linked to abnormalities in child growth/development.(6)  With the advent of the Government of India run “Ujjawal scheme”, the use of clean fuel like liquified petroleum gas (LPG) has increased substantially (up to 92% coverage) in urban areas(7,8) and hence, excluding the minority of urban women who are still using unclean fuels for cooking would increase the generalizability of our findings. |
| Women working in dusty or other potentially hazardous occupations | - Construction activities (road or building), - Industries (including welding, brick kilns) - Traffic management or working in heavy traffic areas like near traffic signals or major roadways, - Professional cooking/ working in restaurants | These work fields are known to be causes of occupational exposure to high levels of specific components of PM as per published studies and this additional exposure can affect the association between environmental PM exposure and its effects. (9–11) |
| **Exclusion from analysis based on identification during antenatal/postnatal follow-up:** | | |
| Pregnancy loss | Spontaneous abortions/ miscarriage: “foetal death in the womb before 20 weeks of gestation”(12)  Abortion: “voluntary termination of pregnancy” (12)  Stillbirth: “Death of a foetus weighing more than or equal to 1000g (equivalent to 28 weeks of gestation)” (13) | As per the fifth (2019-21) round of the National Family Health Survey (NFHS-5), 8.3% of clinically recognized Indian pregnancies result in spontaneous abortions, miscarriage and stillbirth. (14) We will exclude such women from our cohort since child health outcomes will not be available for analysis. |
| Pre-term birth (PTB) | Born before “term” defined as 37 completed weeks of gestation(15) | PTB increases the risk of child morbidities which in turn leads to growth/developmental delays(16) and hence can affect the association between air pollution and child growth/development. |
| History of birth asphyxia | APGAR score <7 at the 1st minute after birth; failure to initiate and sustain breathing at birth (17,18) | Low APGAR scores at 1st minute have been linked to delayed development in children(19) and hence can affect the association between air pollution and child growth/development. |
| Diagnosed congenital anomalies | Structural or functional anomalies/ birth defects originating in the intrauterine period that are clinically diagnosed in study children (found in antenatal USG or clinically diagnosed during follow-up). | In India, there is a 1.85% pooled prevalence of congenital anomalies as reported by the meta-analysis of Bhide and Kar 2018.(20) Congenital anomalies predispose children to developmental delays(21,22) and hence, we planned to exclude this category. |

aAmong children born at “term” who are followed-up, we will identify cases of child mortality (including neonatal deaths occurring between birth till 28 completed days after birth and infant deaths occurring within one year of life)(13) as well as other morbidities such as low-birth-weight (LBW) (i.e., “birth weight less than or equal to 2499 grams”),(13) small for gestational age (SGA) (“birth weight below 10th percentile for gestational age”),(23). The data of such children will be used in the analysis.

# References:

1. Kuppusamy P, Prusty RK, Kale DP. High-risk pregnancy in India: Prevalence and contributing risk factors – a national survey-based analysis. *J Glob Health* 13:04116. doi: 10.7189/jogh.13.04116

2. Ford HB, Schust DJ. Recurrent Pregnancy Loss: Etiology, Diagnosis, and Therapy. *Rev Obstet Gynecol* (2009) 2:76–83.

3. Early pregnancy loss | National Health Portal Of India. https://www.nhp.gov.in/disease/gynaecology-and-obstetrics/early-pregnancy-loss [Accessed November 11, 2022]

4. Wennerholm U-B, Bergh C. Perinatal outcome in children born after assisted reproductive technologies. *Ups J Med Sci* 125:158–166. doi: 10.1080/03009734.2020.1726534

5. India - Census of India 2011 - Houselisting and Housing Census Schedule - English. (2011) https://censusindia.gov.in/nada/index.php/catalog/40450 [Accessed February 9, 2024]

6. Islam S, Rana MJ, Mohanty SK. Cooking, smoking, and stunting: Effects of household air pollution sources on childhood growth in India. *Indoor Air* (2021) 31:229–249. doi: 10.1111/ina.12730

7. Multiple Indicator Survey (MIS) - NSS 78th Round Report [2020-21]- Press Note. *Press Information Bureau, Government of India* (2023) https://pib.gov.in/pib.gov.in/Pressreleaseshare.aspx?PRID=1904907 [Accessed February 9, 2024]

8. PMUY scheme: Encouraging innovations in LPG energy mix, efficiency, conservation. *Press Information Bureau, Government of India* (2022) https://pib.gov.in/pib.gov.in/Pressreleaseshare.aspx?PRID=1876494 [Accessed February 9, 2024]

9. Langlois PH, Hoyt AT, Desrosiers TA, Lupo PJ, Lawson CC, Waters MA, Rocheleau CM, Shaw GM, Romitti PA, Gilboa SM, et al. Maternal occupational exposure to polycyclic aromatic hydrocarbons and small for gestational age offspring. *Occup Environ Med* (2014) 71:529–535. doi: 10.1136/oemed-2013-101833

10. Norlén F, Gustavsson P, Wiebert P, Rylander L, Albin M, Westgren M, Plato N, Selander J. Occupational exposure to inorganic particles during pregnancy and birth outcomes: a nationwide cohort study in Sweden. *BMJ Open* (2019) 9:e023879. doi: 10.1136/bmjopen-2018-023879

11. Quansah R, Jaakkola JJK. Paternal and maternal exposure to welding fumes and metal dusts or fumes and adverse pregnancy outcomes. *Int Arch Occup Environ Health* (2009) 82:529–537. doi: 10.1007/s00420-008-0349-6

12. Kuppusamy P, Prusty RK, Chaaithanya IK, Gajbhiye RK, Sachdeva G. Pregnancy outcomes among Indian women: increased prevalence of miscarriage and stillbirth during 2015–2021. *BMC Pregnancy and Childbirth* (2023) 23:150. doi: 10.1186/s12884-023-05470-3

13. National Health Profile : 2022. [Annual National Health Profile (NHP) of India]. New Delhi, India.: Central Bureau of Health Intelligence, Directorate General of Health Services, Government of India. (2023). https://www.cbhidghs.nic.in/index1.php?lang=1&level=1&sublinkid=75&lid=1135 [Accessed February 9, 2024]

14. Kuppusamy P, Prusty RK, Chaaithanya IK, Gajbhiye RK, Sachdeva G. Pregnancy outcomes among Indian women: increased prevalence of miscarriage and stillbirth during 2015–2021. *BMC Pregnancy and Childbirth* (2023) 23:150. doi: 10.1186/s12884-023-05470-3

15. ACOG Committee Opinion No 579: Definition of term pregnancy. *Obstet Gynecol* (2013) 122:1139–1140. doi: 10.1097/01.AOG.0000437385.88715.4a

16. Kerstjens JM, Bocca-Tjeertes IF, de Winter AF, Reijneveld SA, Bos AF. Neonatal morbidities and developmental delay in moderately preterm-born children. *Pediatrics* (2012) 130:e265-272. doi: 10.1542/peds.2012-0079

17. NNPD Network, National Neonatology Forum (India). National neonatal-perinatal database : report 2002-2003. New Delhi, India.: NNPD Nodal Center at Department of Pediatrics, WHO Collaborating Centre Newborn Training & Research, All India Institute of Medical Sciences, New Delhi for National Neonatology Forum NNPD Network, India. (2005). https://www.newbornwhocc.org/pdf/nnpd_report_2002-03.PDF [Accessed February 15, 2024]

18. Guidelines on Basic Newborn Resuscitation: Avec résumé d’orientation en Français. World Health Organization. (2012). https://www.who.int/publications/i/item/9789241503693 [Accessed February 15, 2024]

19. Tsuchida T, Yoshida S, Takeuchi M, Kawakami C, Kawakami K, Ito S, Japan Environment, Children’s Study Group. A prospective cohort study of the association between the Apgar score and developmental status at 3 years of age: the Japan Environment and Children’s Study (JECS). *Eur J Pediatr* (2022) 181:661–669. doi: 10.1007/s00431-021-04249-y

20. Bhide P, Kar A. A national estimate of the birth prevalence of congenital anomalies in India: systematic review and meta-analysis. *BMC Pediatr* (2018) 18:175. doi: 10.1186/s12887-018-1149-0

21. Khalil A, Suff N, Thilaganathan B, Hurrell A, Cooper D, Carvalho JS. Brain abnormalities and neurodevelopmental delay in congenital heart disease: systematic review and meta-analysis. *Ultrasound Obstet Gynecol* (2014) 43:14–24. doi: 10.1002/uog.12526

22. Laing S, Walker K, Ungerer J, Badawi N, Spence K. Early development of children with major birth defects requiring newborn surgery. *Journal of Paediatrics and Child Health* (2011) 47:140–147. doi: 10.1111/j.1440-1754.2010.01902.x

23. Melamed N, Baschat A, Yinon Y, Athanasiadis A, Mecacci F, Figueras F, Berghella V, Nazareth A, Tahlak M, McIntyre HD, et al. FIGO (International Federation of Gynecology and Obstetrics) initiative on fetal growth: Best practice advice for screening, diagnosis, and management of fetal growth restriction. *Int J Gynaecol Obstet* (2021) 152:3–57. doi: 10.1002/ijgo.13522
